# Supplementary material for: Cost-Effectiveness of a Real-Time Continuous Glucose Monitoring System Versus Self-Monitoring of Blood Glucose in People with Type 2 Diabetes on Insulin Therapy in the UK
Source: PubMed Central journal article supplement — Diabetes Ther. 2022 Oct 19;13(11-12):1875–90. doi: 10.1007/s13300-022-01324-x (PMC9663778; doi:10.1007/s13300-022-01324-x), 2022-10-19
Supplement: 13300_2022_1324_MOESM1_ESM.pdf [file 13300_2022_1324_MOESM1_ESM.pdf]

**COST-EFFECTIVENESS OF A REAL-TIME CONTINUOUS GLUCOSE  
MONITORING SYSTEM VERSUS SELF-MONITORING OF BLOOD  
GLUCOSE IN PEOPLE WITH TYPE 2 DIABETES ON INSULIN  
THERAPY IN THE UK**

**Authors:** Isitt JJ<sup>1</sup>, Roze S<sup>2</sup>, Sharland H<sup>3</sup>, Cogswell G<sup>4</sup>, Alshannaq H<sup>4,5</sup>,  
Norman GJ<sup>4</sup>, Lynch PM<sup>4</sup>

**Affiliations:** <sup>1</sup> Vyoo Agency, San Diego, CA, USA  
<sup>2</sup> Vyoo Agency, Lyon, France  
<sup>3</sup> Ossian Health Economics and Communications, Basel, Switzerland  
<sup>4</sup> Dexcom, San Diego, CA, USA  
<sup>5</sup> University of Cincinnati College of Medicine, Cincinnati, OH, USA

**Corresponding author:** John J. Isitt

**Telephone:** +1 805-630-8496

**E-mail:** [jisitt@vyoo-agency.com](mailto:jisitt@vyoo-agency.com)

**Supplementary Appendix**

# CHECKLIST OF REPORTING MODEL INPUT IN DIABETES HEALTH ECONOMIC STUDIES

The following study information includes a checklist for transparency as per the Mt Hood Modelling Group recommendations.<sup>1</sup> A trace of HbA1c progression over time in each comparator is also included for transparency of the cost-effectiveness analysis comparing rt-CGM to SMBG in people with T2D on insulin therapy in the United Kingdom.

| Model Input                                 | Checkbox                            | Comments                         |
|---------------------------------------------|-------------------------------------|----------------------------------|
| Simulation cohort                           |                                     |                                  |
| Baseline age                                | <input checked="" type="checkbox"/> | Table 1, page11                  |
| Ethnicity/race                              | <input checked="" type="checkbox"/> | Table 1, page11                  |
| BMI/weight                                  | <input checked="" type="checkbox"/> | Table 1, page11                  |
| Duration of Diabetes                        | <input checked="" type="checkbox"/> | Table 1, page11                  |
| Baseline HbA1c, lipids, and blood pressure  | <input checked="" type="checkbox"/> | Table 1, page11                  |
| Smoking status                              | <input checked="" type="checkbox"/> | Table 1, page11                  |
| Comorbidities                               | <input checked="" type="checkbox"/> | Table 1, page11                  |
| Physical activity                           | <input type="checkbox"/>            | Not included in the study design |
| Baseline treatment                          | <input checked="" type="checkbox"/> | Introduction, page 2             |
| Treatment intervention                      |                                     |                                  |
| Type of treatment                           | <input checked="" type="checkbox"/> | Introduction, page 5             |
| Treatment algorithm for HbA1c over time     | <input checked="" type="checkbox"/> | Appendix, Table 2                |
| Treatment algorithm for other conditions    | <input checked="" type="checkbox"/> | Appendix, Table 2                |
| Treatment initial effects on baseline HbA1c | <input checked="" type="checkbox"/> | Appendix, figure 1               |
| Rules for treatment intensification         | <input checked="" type="checkbox"/> | Appendix, Table 2                |

---

|                                                                                                                                   |   |                                                                                         |
|-----------------------------------------------------------------------------------------------------------------------------------|---|-----------------------------------------------------------------------------------------|
| Long-term effects (adverse effects, treatment adherence and persistence, and residual effects after discontinuation of treatment) | ☒ | Long-term diabetes complications, hypoglycaemia and hyperglycaemia event costs: Table 4 |
| Trajectory of HbA1c                                                                                                               | ☒ | Appendix, figure 1                                                                      |
| Differentiated by acute event in first and subsequent years                                                                       | ☒ | Methods, page 6 and Table 4, page 23                                                    |
| Cost of intervention and other costs (e.g., managing complications adverse events and diagnostics)                                | ☒ | Appendix, Table 1<br>Table 1, page 11<br>Table 4, page 23                               |
| Unit price and resource use separately and give information on discount rates applied                                             | ☒ | Table 1, page 11<br>Table 4, page 23<br>Methods, page 7                                 |
| <b>Health state utilities</b>                                                                                                     |   |                                                                                         |
| Operational mechanics of the assignment of utility values                                                                         | ☒ | Methods, page 7 and Table 3, page 22                                                    |
| Management of multi-health conditions                                                                                             | ☒ | CDM defaults and risk equations                                                         |
| <b>General model characteristics</b>                                                                                              |   |                                                                                         |
| Choice of mortality table and any specific event-related mortality                                                                | ☒ | Appendix, Table 1                                                                       |
| Choice and source of risk equations                                                                                               | ☒ | Appendix, Table 1                                                                       |

---

## IMPACT INVENTORY

The Impact Inventory from the 2nd Panel on Cost-effectiveness in Health and Medicine has been included here for clarification on the impacts and components included in the cost-effectiveness analyses.<sup>2</sup>

| Sector                                                           | Type of Impact                                                                      | Included in This Reference Case Analysis from NHS Perspective |                                                                      | Notes on Sources of Evidence                                         |
|------------------------------------------------------------------|-------------------------------------------------------------------------------------|---------------------------------------------------------------|----------------------------------------------------------------------|----------------------------------------------------------------------|
|                                                                  |                                                                                     | Health Care Sector                                            | Societal                                                             |                                                                      |
| <b>Formal Health Care Sector</b>                                 |                                                                                     |                                                               |                                                                      |                                                                      |
| Health                                                           | <b>Health outcomes (effects)</b>                                                    |                                                               |                                                                      |                                                                      |
|                                                                  | Longevity effects                                                                   | ■                                                             | <input type="checkbox"/>                                             | Lifetime effects from the CORE diabetes model                        |
|                                                                  | Health-related quality-of-life effects                                              | ■                                                             | <input type="checkbox"/>                                             | Benefit of avoiding fingerstick use                                  |
|                                                                  | Other health effects (eg, adverse events and secondary transmissions of infections) | ■                                                             | <input type="checkbox"/>                                             | Benefit of avoiding acute and chronic diabetes-related complications |
|                                                                  | <b>Medical costs</b>                                                                |                                                               |                                                                      |                                                                      |
|                                                                  | Paid for by third-party payers                                                      | ■                                                             | <input type="checkbox"/>                                             | NHS                                                                  |
|                                                                  | Paid for by patients out-of-pocket                                                  | <input type="checkbox"/>                                      | <input type="checkbox"/>                                             |                                                                      |
| Future related medical costs (payers and patients)               | ■                                                                                   | <input type="checkbox"/>                                      | Future costs and clinical outcomes were discounted at 3.5% per annum |                                                                      |
| Future unrelated medical costs (payers and patients)             | <input type="checkbox"/>                                                            | <input type="checkbox"/>                                      |                                                                      |                                                                      |
| <b>Informal Health Care Sector</b>                               |                                                                                     |                                                               |                                                                      |                                                                      |
| Health                                                           | Patient-time costs                                                                  | N/A                                                           | <input type="checkbox"/>                                             |                                                                      |
|                                                                  | Unpaid caregiver-time costs                                                         | N/A                                                           | <input type="checkbox"/>                                             |                                                                      |
|                                                                  | Transportation costs                                                                | N/A                                                           | <input type="checkbox"/>                                             |                                                                      |
| <b>Non-Health Care Sectors (with examples of possible items)</b> |                                                                                     |                                                               |                                                                      |                                                                      |
| Productivity                                                     | Labor market earnings lost                                                          | N/A                                                           | <input type="checkbox"/>                                             |                                                                      |
|                                                                  | Cost of unpaid lost productivity due to illness                                     | N/A                                                           | <input type="checkbox"/>                                             |                                                                      |
|                                                                  | Cost of uncompensated household production                                          | N/A                                                           | <input type="checkbox"/>                                             |                                                                      |
| Consumption                                                      | Future consumption unrelated to health                                              | N/A                                                           | <input type="checkbox"/>                                             |                                                                      |
| Social Services                                                  | Cost of social services as part of intervention                                     | N/A                                                           | <input type="checkbox"/>                                             |                                                                      |
| Legal or Criminal Justice                                        | Number of crimes related to intervention                                            | N/A                                                           | <input type="checkbox"/>                                             |                                                                      |
|                                                                  | Cost of crimes related to intervention                                              | N/A                                                           | <input type="checkbox"/>                                             |                                                                      |

|                 |                                                                     |     |                          |  |
|-----------------|---------------------------------------------------------------------|-----|--------------------------|--|
| Education       | Impact of intervention on educational achievement of population     | N/A | <input type="checkbox"/> |  |
| Housing         | Cost of intervention on home improvements (eg, removing lead paint) | N/A | <input type="checkbox"/> |  |
| Environment     | Production of toxic waste pollution by intervention                 | N/A | <input type="checkbox"/> |  |
| Other (specify) | Other impacts                                                       | N/A | <input type="checkbox"/> |  |

Reproduced with permission from [JAMA.:2016: 316(10):1093-103]. Copyright©(2022) American Medical

Association. All rights reserved.

## CHEERS CHECKLIST<sup>3</sup>

| Topic                                | No. | Item                                                                                                                            | Location where item is reported                                                  |
|--------------------------------------|-----|---------------------------------------------------------------------------------------------------------------------------------|----------------------------------------------------------------------------------|
| <b>Title</b>                         |     |                                                                                                                                 |                                                                                  |
|                                      | 1   | Identify the study as an economic evaluation and specify the interventions being compared.                                      | Title                                                                            |
| <b>Abstract</b>                      |     |                                                                                                                                 |                                                                                  |
|                                      | 2   | Provide a structured summary that highlights context, key methods, results, and alternative analyses.                           | Abstract                                                                         |
| <b>Introduction</b>                  |     |                                                                                                                                 |                                                                                  |
| <b>Background and objectives</b>     | 3   | Give the context for the study, the study question, and its practical relevance for decision making in policy or practice.      | Introduction                                                                     |
| <b>Methods</b>                       |     |                                                                                                                                 |                                                                                  |
| <b>Health economic analysis plan</b> | 4   | Indicate whether a health economic analysis plan was developed and where available.                                             | Methods, First Paragraph, "Model Structure"                                      |
| <b>Study population</b>              | 5   | Describe characteristics of the study population (such as age range, demographics, socioeconomic, or clinical characteristics). | Methods, Second Paragraph, "Simulation cohort and treatment effects" and Table 1 |
| <b>Setting and location</b>          | 6   | Provide relevant contextual information that may influence findings.                                                            | Not reported                                                                     |
| <b>Comparators</b>                   | 7   | Describe the interventions or strategies being compared and why chosen.                                                         | Introduction: Fifth paragraph, Methods: "Costs and Utilities"                    |
| <b>Perspective</b>                   | 8   | State the perspective(s) adopted by the study and why chosen.                                                                   | Methods: "Time horizon, perspective and discount rate"                           |
| <b>Time horizon</b>                  | 9   | State the time horizon for the study and why appropriate.                                                                       | Methods: "Time horizon, perspective and discount rate"                           |

| <b>Topic</b>                                            | <b>No.</b> | <b>Item</b>                                                                                                                                     | <b>Location where item is reported</b>                              |
|---------------------------------------------------------|------------|-------------------------------------------------------------------------------------------------------------------------------------------------|---------------------------------------------------------------------|
| <b>Discount rate</b>                                    | 10         | Report the discount rate(s) and reason chosen.                                                                                                  | Methods: "Time horizon, perspective and discount rate"              |
| <b>Selection of outcomes</b>                            | 11         | Describe what outcomes were used as the measure(s) of benefit(s) and harm(s).                                                                   | Methods: "Model Structure"                                          |
| <b>Measurement of outcomes</b>                          | 12         | Describe how outcomes used to capture benefit(s) and harm(s) were measured.                                                                     | Methods: "Costs and Utilities", Second paragraph                    |
| <b>Valuation of outcomes</b>                            | 13         | Describe the population and methods used to measure and value outcomes.                                                                         | Methods: "Costs and Utilities", Second paragraph, Table 3           |
| <b>Measurement and valuation of resources and costs</b> | 14         | Describe how costs were valued.                                                                                                                 | Methods: "Costs and Utilities", First and Second paragraph, Table 2 |
| <b>Currency, price date, and conversion</b>             | 15         | Report the dates of the estimated resource quantities and unit costs, plus the currency and year of conversion.                                 | Methods: "Costs and Utilities", First paragraph                     |
| <b>Rationale and description of model</b>               | 16         | If modelling is used, describe in detail and why used. Report if the model is publicly available and where it can be accessed.                  | Methods: "Model Structure"                                          |
| <b>Analytics and assumptions</b>                        | 17         | Describe any methods for analysing or statistically transforming data, any extrapolation methods, and approaches for validating any model used. | Methods: "Model Structure"                                          |
| <b>Characterising heterogeneity</b>                     | 18         | Describe any methods used for estimating how the results of the study vary for subgroups.                                                       | Methods: "Sensitivity analysis", Second paragraph                   |
| <b>Characterising distributional effects</b>            | 19         | Describe how impacts are distributed across different individuals or adjustments made to reflect priority populations.                          | Methods: "Sensitivity analysis", Second paragraph                   |
| <b>Characterising uncertainty</b>                       | 20         | Describe methods to characterise any sources of uncertainty in the analysis.                                                                    | Methods: "Sensitivity analysis"                                     |

| <b>Topic</b>                                                                 | <b>No.</b> | <b>Item</b>                                                                                                                                                                   | <b>Location where item is reported</b>   |
|------------------------------------------------------------------------------|------------|-------------------------------------------------------------------------------------------------------------------------------------------------------------------------------|------------------------------------------|
| <b>Approach to engagement with patients and others affected by the study</b> | 21         | Describe any approaches to engage patients or service recipients, the general public, communities, or stakeholders (such as clinicians or payers) in the design of the study. | Not reported                             |
| <b>Results</b>                                                               |            |                                                                                                                                                                               |                                          |
| <b>Study parameters</b>                                                      | 22         | Report all analytic inputs (such as values, ranges, references) including uncertainty or distributional assumptions.                                                          | Tables 1, 2 and 3                        |
| <b>Summary of main results</b>                                               | 23         | Report the mean values for the main categories of costs and outcomes of interest and summarise them in the most appropriate overall measure.                                  | Results: "Base case analysis", Table 4   |
| <b>Effect of uncertainty</b>                                                 | 24         | Describe how uncertainty about analytic judgments, inputs, or projections affect findings. Report the effect of choice of discount rate and time horizon, if applicable.      | Results: "Sensitivity analysis", Table 5 |
| <b>Effect of engagement with patients and others affected by the study</b>   | 25         | Report on any difference patient/service recipient, general public, community, or stakeholder involvement made to the approach or findings of the study                       | Not reported                             |
| <b>Discussion</b>                                                            |            |                                                                                                                                                                               |                                          |
| <b>Study findings, limitations, generalisability, and current knowledge</b>  | 26         | Report key findings, limitations, ethical or equity considerations not captured, and how these could affect patients, policy, or practice.                                    | Discussion: First to Fourth paragraph    |
| <b>Other relevant information</b>                                            |            |                                                                                                                                                                               |                                          |
| <b>Source of funding</b>                                                     | 27         | Describe how the study was funded and any role of the funder in the identification, design, conduct, and reporting of the analysis                                            | Acknowledgements: "Funding"              |
| <b>Conflicts of interest</b>                                                 | 28         | Report authors conflicts of interest according to journal or International Committee of Medical Journal Editors requirements.                                                 | Acknowledgements: "Conflict of interest" |



## SUPPLEMENTARY TABLES

**Supplementary Table 1      General Model Characteristics**

| Algorithm         | Description                                                                                                                                                                                                                                                                           |
|-------------------|---------------------------------------------------------------------------------------------------------------------------------------------------------------------------------------------------------------------------------------------------------------------------------------|
| Mortality rate    | Combined UKPDS 68 <sup>4</sup>                                                                                                                                                                                                                                                        |
| Risk equations    | <ol style="list-style-type: none"> <li>1. Myocardial infarction: UKPDS Outcomes Model Version 2</li> <li>2. Stroke: UKPDS Outcomes Model Version 2</li> <li>3. Angina: UKPDS Outcomes Model Version 2</li> <li>4. Heart failure: UKPDS Outcomes Model Version 2</li> </ol>            |
| Model uncertainty | <ol style="list-style-type: none"> <li>1. UKPDS 68 used for T2D specific health state transition probabilities.</li> <li>2. Probabilistic sensitivity analysis specified with Monte Carlo 2<sup>nd</sup> order sampling, with 1000 patients and 1000 bootstrap iterations.</li> </ol> |

T2D, type 2 diabetes; UKPDS, UK Prospective Diabetes Study.

**Supplementary Table 2      Treatment Algorithms**

| Algorithm/Characteristic                                   | Description                                                                                                                      |
|------------------------------------------------------------|----------------------------------------------------------------------------------------------------------------------------------|
| HbA1c evolution overtime                                   | Clinical Tables: Index 0; yearly progression 0.15*                                                                               |
| Initial treatment effect HbA1c                             | 0.56% reduction in HbA1c for rt-CGM after 12 months follow-up (based on mean adjusted difference between rt-CGM and SMBG groups) |
| Rules for treatment intensification (HbA1c cut-off)        | Restrict to HbA1c values lower than 7.0% points                                                                                  |
| Switch treatment when HbA1c critical threshold is exceeded | Change treatment at HbA1c critical threshold of 12.0% points                                                                     |

HbA1c, glycosylated hemoglobin; rt-CGM, real-time continuous glucose monitoring.

\*The yearly progression of 0.15 HbA1c units is based on the clinical tables setting in the CORE diabetes model indexed over the duration of diabetes. The clinical tables are derived from results of the of the Diabetes Control and Complications Trial (DCCT) and the Epidemiology of Diabetes Interventions and Complications study (EDIC; 1994 to present). The EDIC study represents the observational follow-up study from the DCCT.

Supplementary Table 3

## Annual Costs for rt-CGM and SMBG in type 2 Diabetes in the UK

|                                                                                                                                                                                                                   | Unit cost (GBP) | Units | Net cost (GBP) |
|-------------------------------------------------------------------------------------------------------------------------------------------------------------------------------------------------------------------|-----------------|-------|----------------|
| rt-CGM annual cost<br>rt-CGM annual costs were based on current U.K. prices and assumed an annual usage of 36 sensors and 4 transmitters. <sup>5</sup>                                                            | 1,250           | 1     | 1,250          |
| SMBG annual cost<br>Annual costs of strips and lancets were derived from published sources. <sup>6,7</sup> Utilization of 3.8 times per day was sourced from DIAMOND for type 2 patients on insulin. <sup>8</sup> | 0.2897 per test | 1,387 | 401.81         |

GBP, Great British pound; rt-CGM, real-time continuous glucose monitoring; SMBG, self-monitoring of blood glucose

## SUPPLEMENTARY FIGURES

Supplementary Figure 1 HbA1c Trajectory in rt-CGM versus SMBG

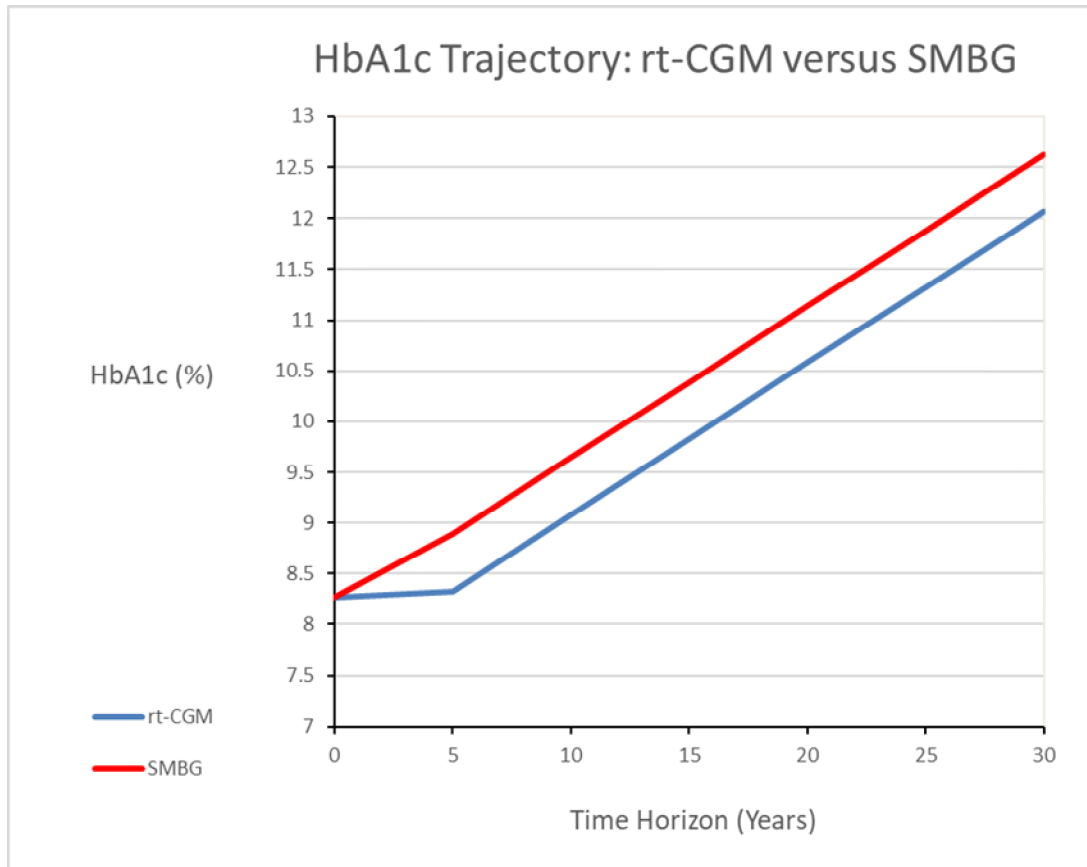

HbA1c: glycated hemoglobin; rt-CGM: real-time glucose monitoring; SMBG: self-monitoring of blood glucose.

## REFERENCES

---

- <sup>1</sup> Palmer AJ, Si L, Tew M, Hua X, Willis MS, Asseburg C, McEwan P, Leal J, Gray A, Foos V, Lamotte M, Feenstra T, O'Connor PJ, Brandle M, Smolen HJ, Gahn JC, Valentine WJ, Pollock RF, Breeze P, Brennan A, Pollard D, Ye W, Herman WH, Isaman DJ, Kuo S, Laiteerapong N, Tran-Duy A, Clarke PM. Computer Modeling of Diabetes and Its Transparency: A Report on the Eighth Mount Hood Challenge. *Value Health*. 2018 Jun;21(6):724-731.)
- <sup>2</sup> Sanders GD, Neumann PJ, Basu A, Brock DW, Feeny D, Krahn M, Kuntz KM, Meltzer DO, Owens DK, Prosser LA, Salomon JA, Sculpher MJ, Trikalinos TA, Russell LB, Siegel JE, Ganiats TG. Recommendations for Conduct, Methodological Practices, and Reporting of Cost-effectiveness Analyses: Second Panel on Cost-Effectiveness in Health and Medicine. *JAMA*. 2016 Sep 13;316(10):1093-103.
- <sup>3</sup> Husereau D, Drummond M, Augustovski F, de Bekker-Grob E, Briggs AH, Carswell C, Caulley L, Chaiyakunapruk N, Greenberg D, Loder E, Mauskopf J, Mullins CD, Petrou S, Pwu RF, Staniszewska S. Consolidated Health Economic Evaluation Reporting Standards (CHEERS) 2022 Explanation and Elaboration: A Report of the ISPOR CHEERS II Good Practices Task Force. *Value Health*. 2022 Jan;25(1):10-31.
- <sup>4</sup> Clarke PM, Gray AM, Briggs A, Farmer AJ, Fenn P, Stevens RJ, Matthews DR, Stratton IM, Holman RR; UK Prospective Diabetes Study (UKDPS) Group. A model to estimate the lifetime health outcomes of patients with type 2 diabetes: the United Kingdom Prospective Diabetes Study (UKPDS) Outcomes Model (UKPDS no. 68). *Diabetologia*. 2004 Oct;47(10):1747-59.
- <sup>5</sup> Dexcom data on file
- <sup>6</sup> The East of England Priorities Advisory Committee. Guidance Statement: FreeStyle Libre Glucose Monitoring System 1.0, PrescQIPP, Q:14 2017
- <sup>7</sup> National Institute for Health and Care Excellence. Type 2 diabetes in adults: management (NICE guideline 29)[cited 2021 April 19]; Available from <https://www.nice.org.uk/guidance/ng28/>.
- <sup>8</sup> Beck RW, Riddlesworth TD, Ruedy K, Ahmann A, Haller S, Kruger D, McGill JB, Polonsky W, Price D, Aronoff S, Aronson R, Toschi E, Kollman C, Bergenstal R; DIAMOND Study Group. Continuous Glucose Monitoring Versus Usual Care in Patients With Type 2 Diabetes Receiving Multiple Daily Insulin Injections: A Randomized Trial. *Ann Intern Med*. 2017 Sep 19;167(6):365-374
